# Supplementary material for: Transcriptomic Analysis of Betula halophila in Response to Salt Stress
Source: MDPI journal article supplement (doi:10.3390/ijms19113412), 2018-10-31
Supplement: s1 [file s1]

## GO classification

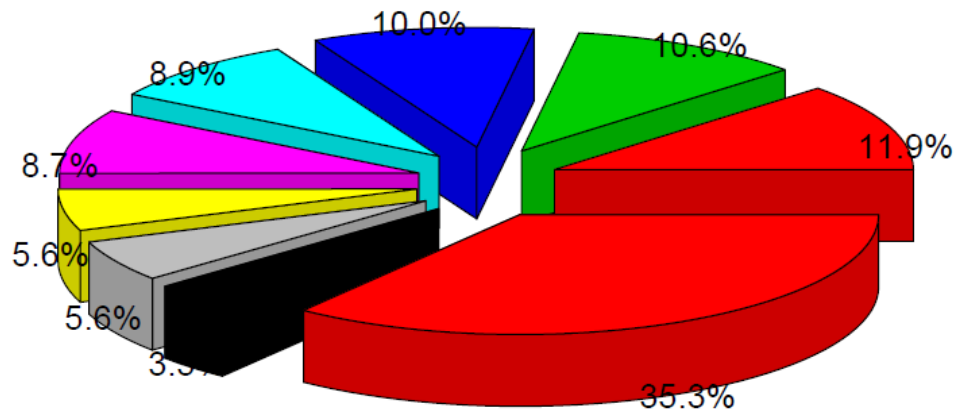

- binding (187)
- cellular process (166)
- metabolic process (157)
- catalytic activity (140)
- single-organism process (137)
- cell (88)
- cell part (88)
- organelle (55)
- other (555)

## KEGG classification

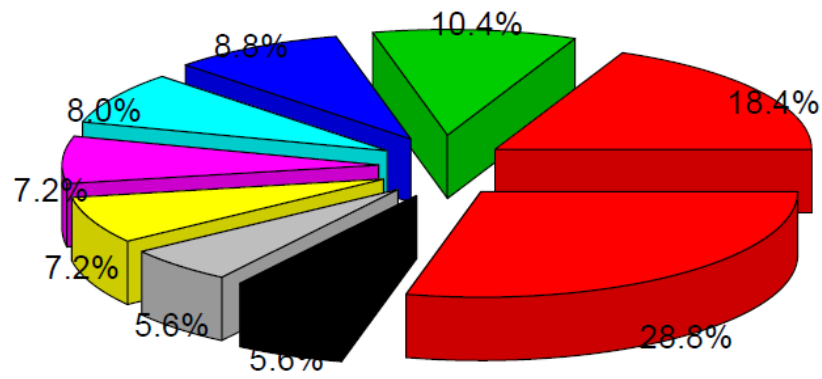

- Translation (23)
- Folding, sorting and degradation (13)
- Environmental adaptation (11)
- Carbohydrate metabolism (10)
- Lipid metabolism (9)
- Biosynthesis of other secondary metabolites (9)
- Transcription (7)
- Metabolism of terpenoids and polyketides (7)
- other (36)
